# Supplementary figures and images for: Germline-limited transposon remnants foster somatic genome diversification
Source: Research Square preprint supplement (doi:10.21203/rs.3.rs-7978461/v1), 2025-11-21

Supplementary Figure 2. Early stage 25bp scanRNAs map homogenously to the germline assembly

**a**

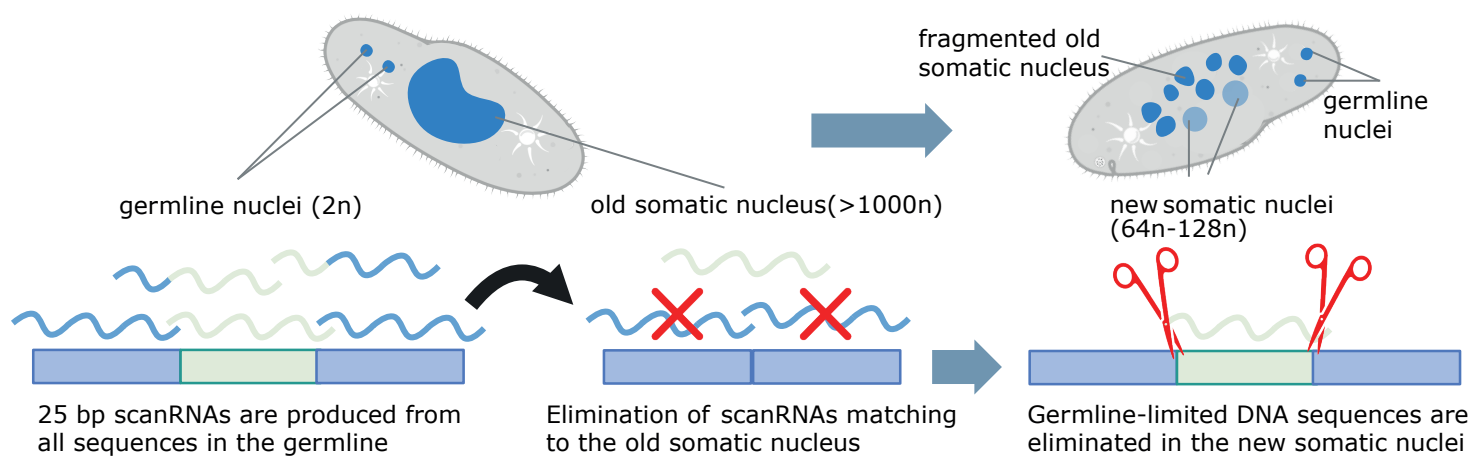

**b**

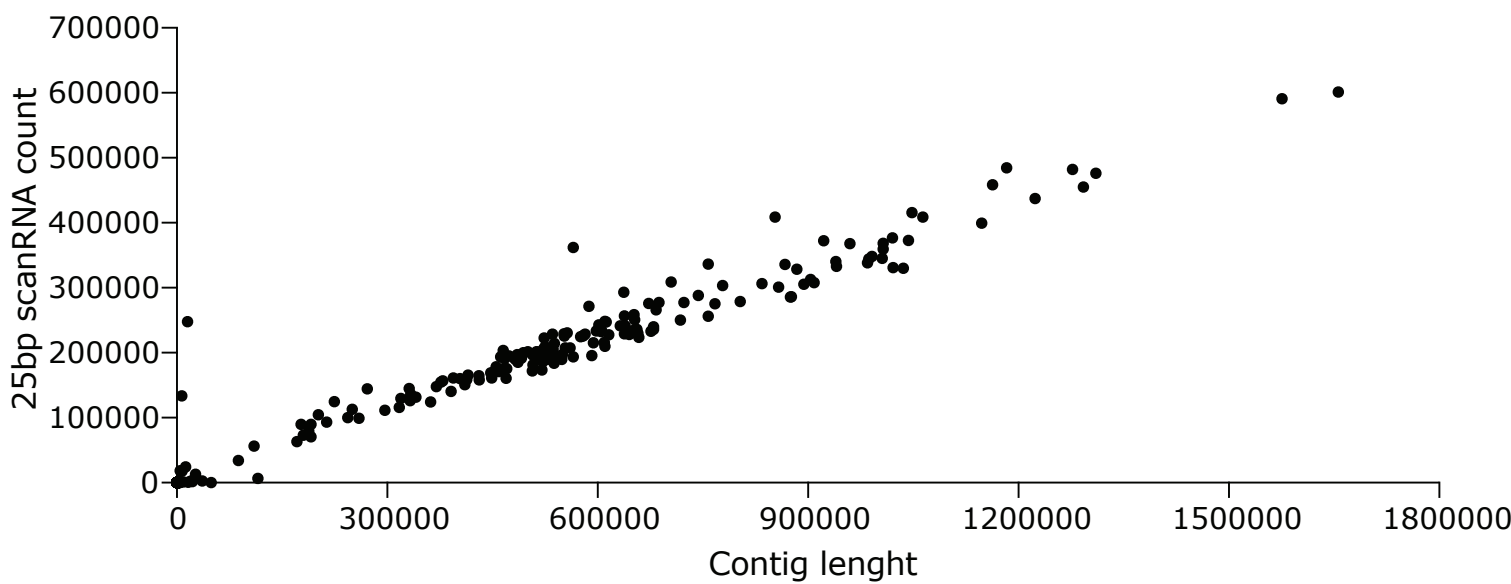

Supplement: Supplementary file 1 [file 5be4714b7b767028f2052bb3.pdf]

Supplementary figure 6. Many transcript isoforms originate from germline limited sequences

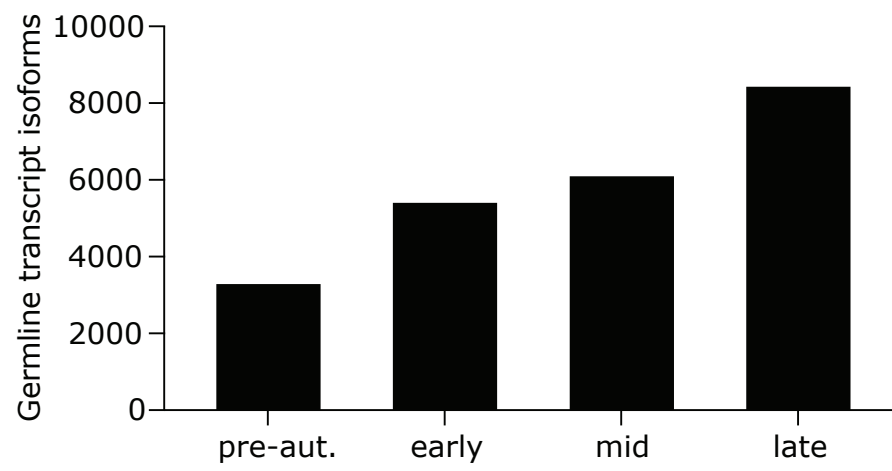

Supplement: Supplementary file 2 [file 8f75afb1e18929662e175bb4.pdf]
